# Supplementary material for: The receptor-like kinase NIK1 targets FLS2/BAK1 immune complex and inversely modulates antiviral and antibacterial immunity
Source: PubMed Central journal article supplement (PMC6825196; doi:10.1038/s41467-019-12847-6), 2019-11-01
Supplement: 41467_2019_12847_MOESM1_ESM.pdf [file 41467_2019_12847_MOESM1_ESM.pdf]

**Supplementary Information (Supplementary Figures / Table)**

**The receptor-like kinase NIK1 targets FLS2/BAK1 immune complex and  
inversely modulates antiviral and antibacterial immunity**

Li et al, 2019

## Supplementary Figure 1

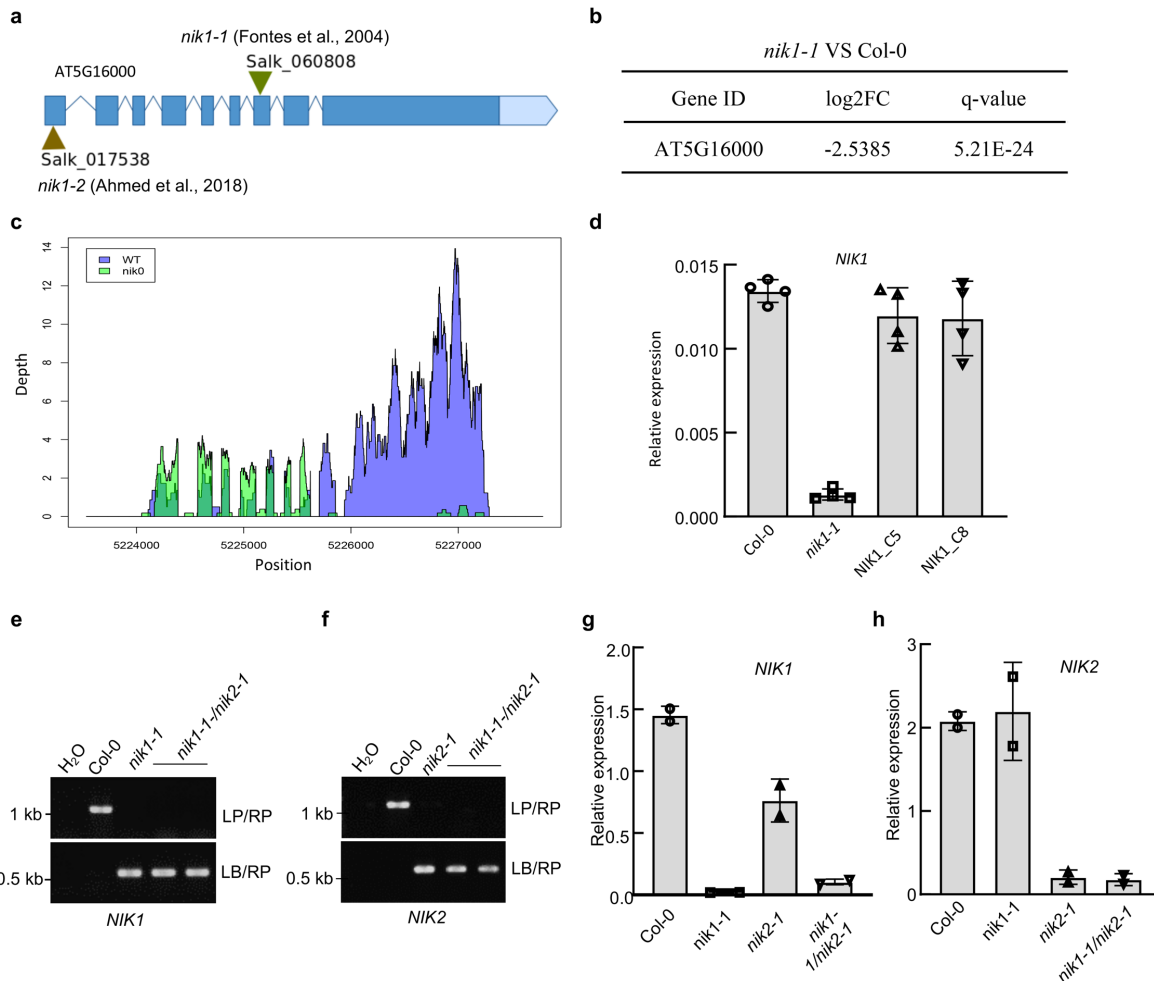

**Supplementary Fig. 1 Characterization of *nik1-1* and *nik2-1* T-DNA insertional mutants. a** Schematic structure of the annotated AT5G1600 (*NIK1*) locus and T-DNA insertional mutants. Blue boxes indicate exons and curve lines represent introns. Triangles indicate the positions of the T-DNA insertions in the *nik1-1* and *nik1-2* mutants. **b** *NIK1* relative expression level in *nik1-1* mutant compared to Col-0 as determined by RNA-seq. **c** High throughput sequencing reads mapped to *NIK1* in *nik1-1* mutant. **d** *NIK1* transcript accumulation in *nik1-1* and in complemented lines (R4 generation). Total RNA was isolated from Col-0, *nik1-1*, *35S:NIK1-GFP/nik1-1* lines NIK1\_C5 and NIK1\_C8 leaves and the expression of *NIK1* was monitored by quantitative RT-PCR. Mean  $\pm$  95% confidence intervals based on bootstrap resampling replicates of three independent experiments. **e** Genotyping of *nik1-1/nik2-1* double mutant for a T-DNA insertion in *NIK1*. PCR was carried out with genomic DNA using either the LB/*NIK1*\_RP primers for T-DNA or *NIK1*\_LP/*NIK1*\_RP primers for gDNA. **f** Genotyping of *nik1-1/nik2-1* double mutant for a T-DNA insertion in *NIK2*. PCR was carried out with genomic DNA using either the LB/*NIK2*\_RP primers for T-DNA or *NIK2*\_LP/*NIK2*\_RP primers for gDNA. **g** and **h** Relative *NIK1* or *NIK2* expression levels in double mutants. Total RNA was isolated from the indicated lines, and the relative gene expression was quantified by qRT-PCR and *UBQ10* as an internal control. The values are mean  $\pm$  SE (n=3).

## Supplementary Figure 2

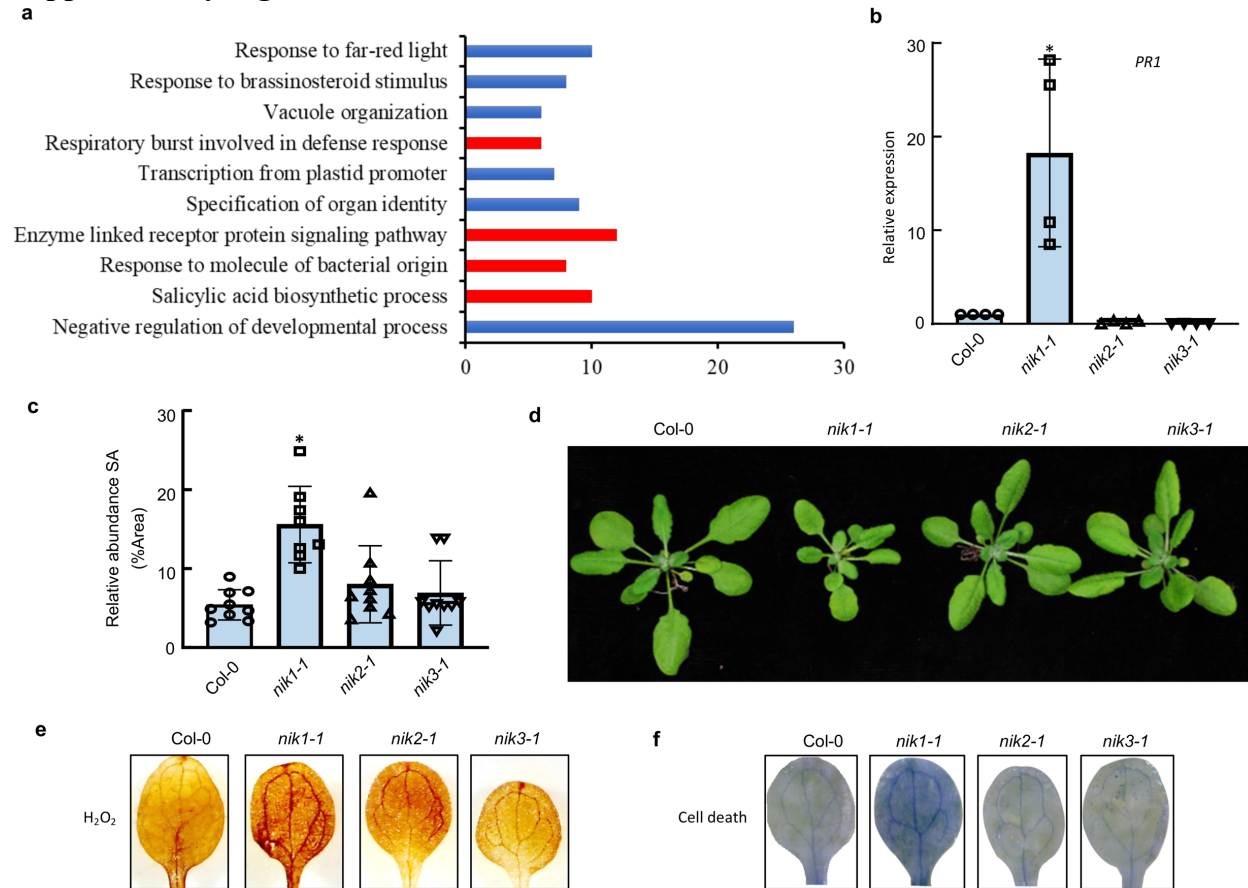

**Supplementary Fig. 2 Constitutive activation of SA-related defence responses in the *nik1-1* knockout line.** **a** Functional categorization of up-regulated genes in *nik1-1* mutant by RNA-seq. The bar graphs illustrate the distribution of up-regulated genes that represent relevant hubs across functional categories as defined by the Gene Ontology (GO) biological process. The numbers represent the percentage of genes up-regulated in *nik1-1* relative to the WT control that represent relevant hubs in each category. **b** *PR1* is constitutively up-regulated in the *nik1-1* mutant. Total RNA was isolated from Col-0, *nik1-1*, *nik2-1* and *nik3-1* lines, and the relative *PR1* expression was quantified by qRT-PCR and *UBQ10* as an internal control. The mean values are relative to the wild-type ( $n=3$ ). Asterisks indicate significant differences ( $p < 0.05$ ). **c** Enhanced accumulation of SA in *nik1-1* plants. The relative SA content was determined in leaf extracts from the Col-0 and *NIKS* mutants. Values are the mean  $\pm$  SD of three replicates. Statistical significance is indicated by asterisks ( *t*-test,  $p < 0.05$ ). **(d)** Plant growth phenotype of different *NIKS* mutants. The Col-0, *nik1-1*, *nik2-1* and *nik3-1* plants grown under normal conditions. Images were taken four weeks post germination. **(e)**  $H_2O_2$  production in Col-0 and *niks* mutants. DAB staining for  $H_2O_2$  production is shown in the leaves of knockout lines and Col-0. **(f)** Cell death in Col-0 and *niks* mutants. Trypan blue staining for cell death is shown in leaves of knockout lines and Col-0.

### Supplementary Figure 3

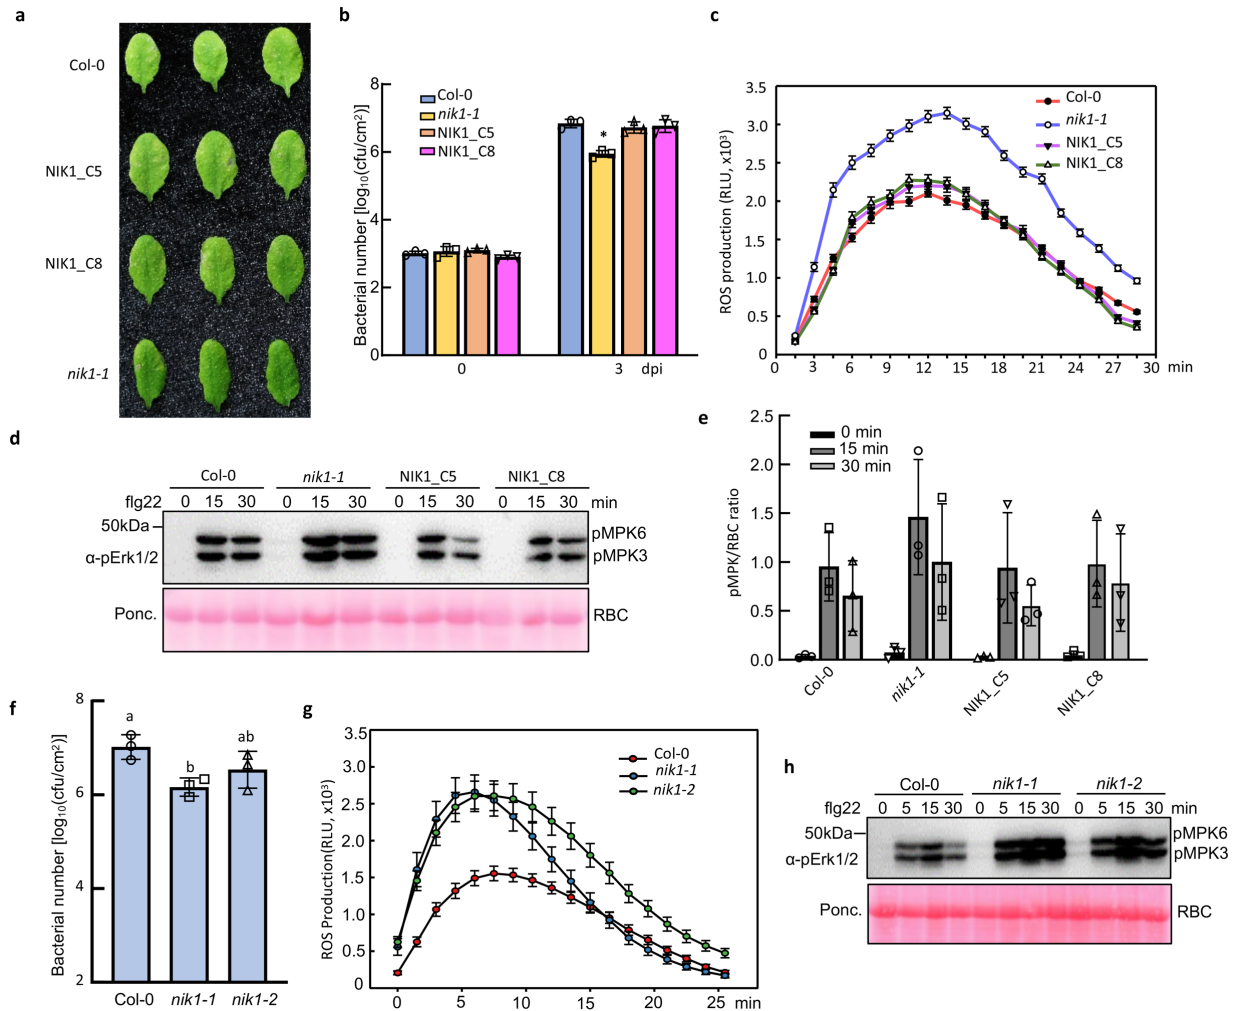

**Supplementary Fig. 3 NIK1 reintroduction restores the *nik1-1* mutant disease phenotype.** **a** Disease symptom caused by *Pst* DC3000 infection. Images were taken at 4 dpi. **b** Bacterial growth of *Pst* DC3000 4 days post inoculation. Four-week-old plants Col-0, *nik1-1* and *nik1-1*-complementing lines were hand-inoculated with bacterial suspensions of *Pst* DC3000 at a density of  $5 \times 10^5$  cfu/mL, and bacterial populations were quantified at 0 and 4 dpi. **c** Flg22-induced ROS burst in *nik1-1*-complementing lines. Leaf discs from 5-week-old plants were treated with water or 100 nM flg22 and the relative light units (RLU) were detected. Values are the mean  $\pm$  SE ( $n > 15$ ). **d** Flg22-induced MAPK activation in *nik1-1*-complementing lines. Ten-day-old seedlings of the indicated lines were treated with 100 nM flg22. MAPK activation was detected with an  $\alpha$ -pERK antibody (top panel). Total protein input was evaluated by Ponceau S staining for Rubisco (RBC) (bottom panel). **e** Quantitative data for MAPK activation in (d). IB images were analysed by ImageJ and the values are the mean  $\pm$  SD of three replicates. **f** Growth of *Pst* DC3000 four days post-infection. Four-week-old plants of Col-0, *nik1-1*, and *nik1-2* mutants were hand-inoculated with *Pst* DC3000. **g** Flg22-induced ROS burst in WT, *nik1-1* and *nik1-2* plants. Leaf discs from 5-week-old plants were treated with water or 500 nM flg22 for 30 min, and the relative light units (RLU) were detected. Values represent the mean  $\pm$  SE ( $n > 10$ ). **h** Flg22-induced MAPK activation in WT, *nik1-1* and *nik1-2* plants. MAPK activity was assayed as described in Fig. 2b.

## Supplementary Figure 4

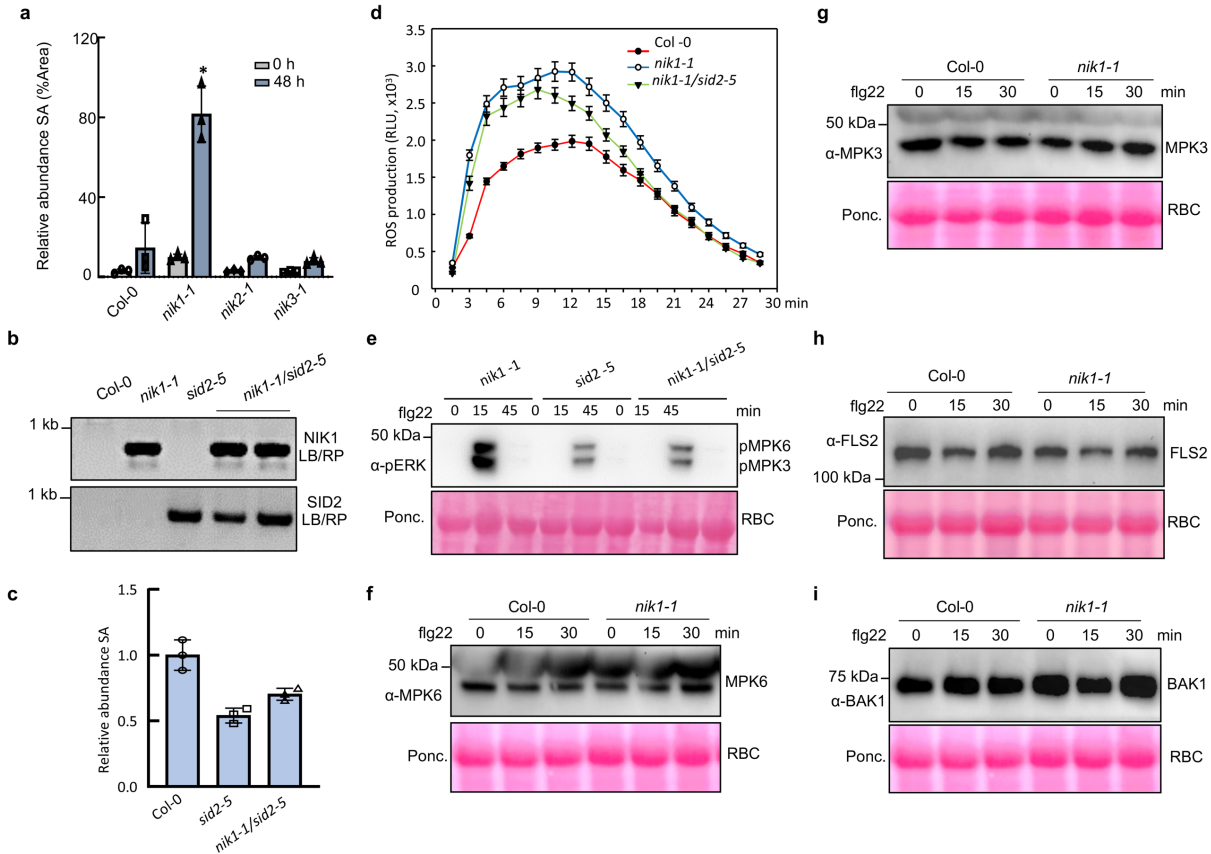

**Supplementary Fig. 4 The resistant phenotype of *nik1-1* mutants is independent of high SA accumulation.** **a** Relative SA accumulation level in Col-0 and *nik* mutants post bacterial infection. The bars indicate 95% confidence intervals based on the t test ( $p < 0.05$ ,  $n = 3$ ). Asterisks indicate significant differences relative to the same treatment in Col-0. **b** Genotyping *nik1-1/sid2-5* double mutants. PCR was carried out with genomic DNA using either the LB/*NIK1*\_RP primers for *NIK1* T-DNA or LB/*SID2*\_RP primers for *SID2* T-DNA. **c** Relative SA accumulation level in *nik1-1*, *sid2-5* and *nik1-1/sid2-5*. The relative content of salicylic acid (SA) was determined in leaf extracts from four-week-old plants. The error bars indicate 95% confidence intervals based on t-tests ( $p < 0.05$ ,  $n = 3$ ). **d** Total ROS production in response to flg22 treatment. Leaf discs from 5-week-old plants were treated with water or 100 nM flg22 and the relative light units (RLU) were detected. Values are the mean  $\pm$  SE ( $n > 15$ ). **e** Flg22-induced MAPK activity in *nik1-1*, *sid2-5* and *nik1-1/sid2-5*. **f** and **g** Endogenous MPK6 and MPK3 protein levels in *nik1-1* mutant. Ten-day-old seedlings of indicated lines were treated with 100 nM flg22 for 15 and 30 min. MPK protein levels were detected by  $\alpha$ -MPK6 and  $\alpha$ -MPK3 antibodies. **h** Endogenous FLS2 protein levels in *nik1-1* mutants. FLS2 protein levels were detected with an  $\alpha$ -FLS2 antibody (top panel). Total protein input was showed by Ponceau S staining for RBC (bottom panel). **i** Endogenous BAK1 protein levels in *nik1-1* mutants. BAK1 protein levels were detected using an  $\alpha$ -BAK1 antibody.

## Supplementary Figure 5

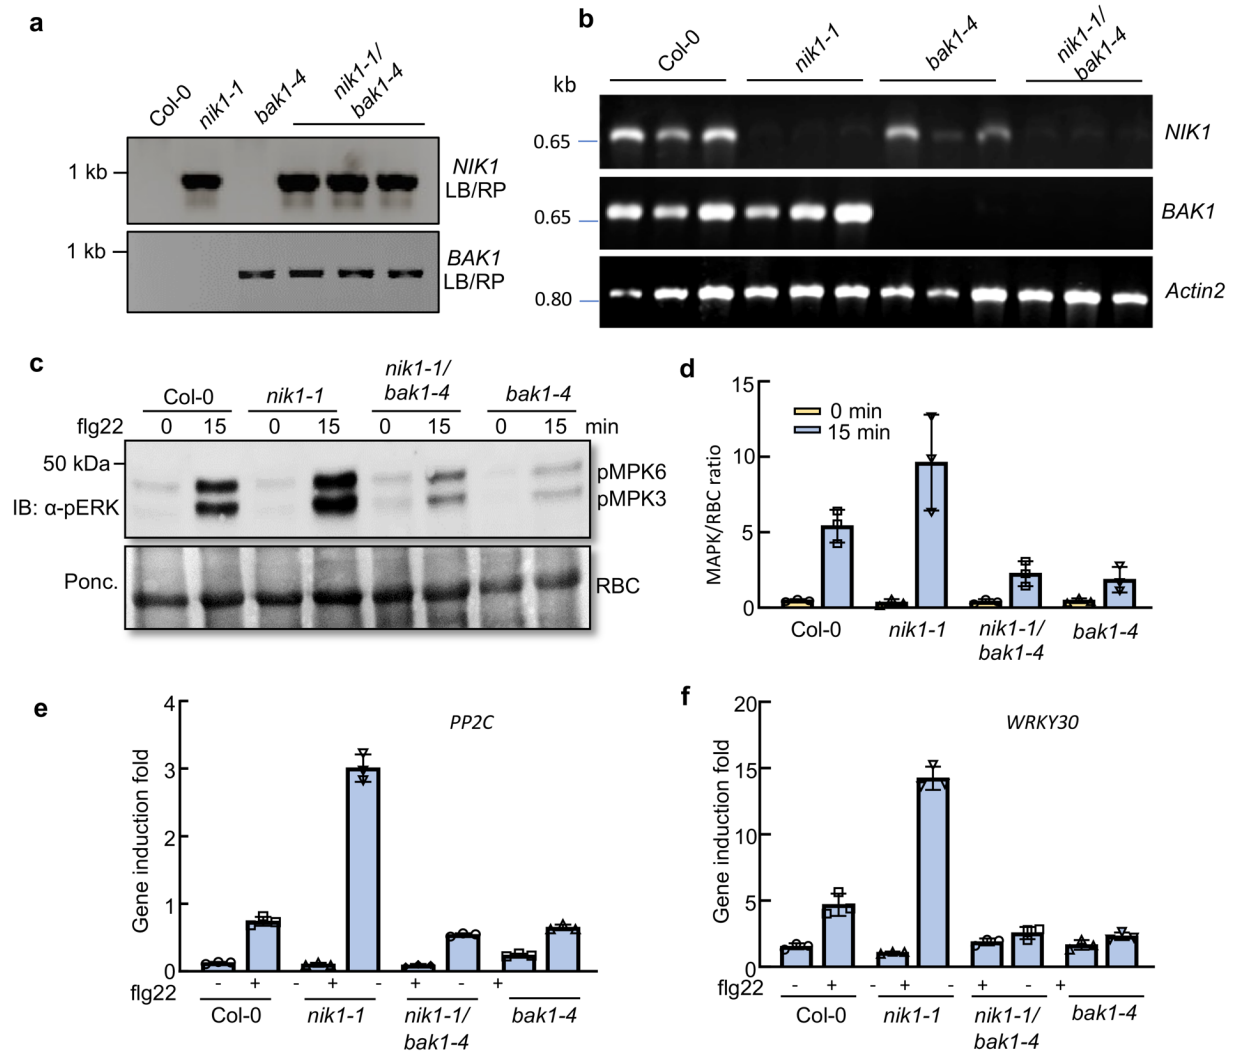

**Supplementary Fig. 5 BAK1 is required by NIK1 to suppress flg22-mediated immunity. a** Genotyping analysis of *nik1-1/bak1-4* double mutants. PCR was performed with genomic DNA using either the LB/*NIK1*\_RP primers for *NIK1* T-DNA or LB/*BAK1*\_RP primers for *BAK1* T-DNA. **b** Gene expression levels in *nik1-1/bak1-4* double mutant. RT-PCR analysis of *NIK1* and *BAK1* gene expression with cDNA from the indicated plants. *ACTIN2* served as an internal control. **c** Flg22-induced MAPK activation in Col-0, *nik1-1*, *bak1-4* and *nik1-1/bak1-4*. Ten-day-old seedlings from half MS medium were treated with 100 nM flg22 for 15 min and MAPK activity was detected by immunoblotting (IB) with an  $\alpha$ -pERK antibody (top panel). Total input proteins were showed by Ponceau S staining for RBC (bottom panel). **d** Quantitative data for MAPK activation in (c). IB signals were analysed using ImageJ, and the values represent the mean  $\pm$  ED of three repeats. The error bars indicate 95 % confidence intervals based on t-tests ( $p < 0.05$ ). **e** and **f** *PP2C* and *WRKY30* induction in response to flg22 treatment. Total RNA was extracted from 10-day old seedlings with or without flg22 treatment for 30 min. qPCR was performed with cDNA from the indicated lines. Values are the mean  $\pm$  SD of three repeats.

## Supplementary Figure 6

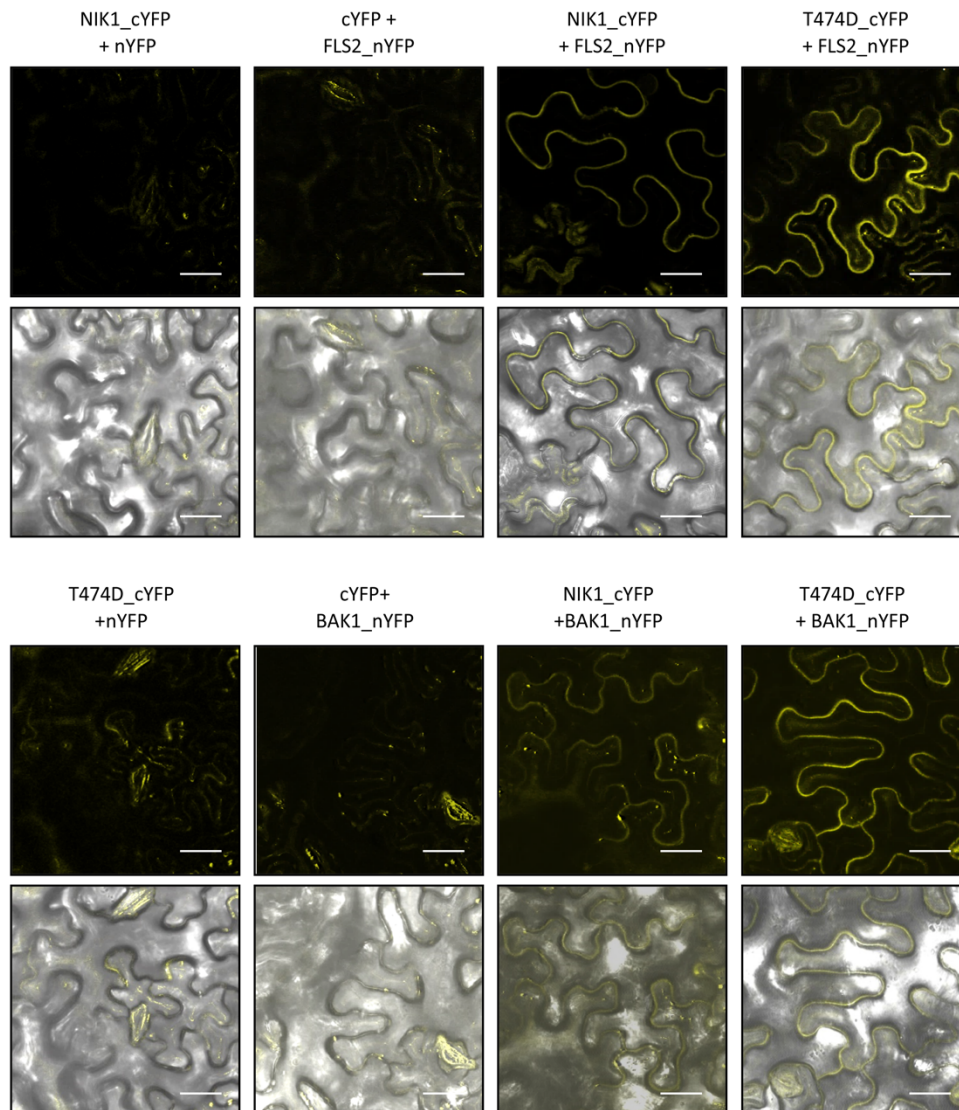

**Supplementary Fig. 6 In vivo interactions between NIK1-T474D and FLS2 or BAK1 by BiFC assays.** Different combinations of nYFP, NIK1-cYFP, T474D-cYFP, FLS2-nYFP or BAK1-nYFP were co-expressed in *N. bethamiana* leaf through agrobacterial-infiltration in the presence of HC-Pro suppressor. Fluorescence (YFP) signal and bright field images were taken of epidermal cells of tobacco with a Confocal microscopy. Scale bars = 20  $\mu$ m.

## Supplementary Figure 7

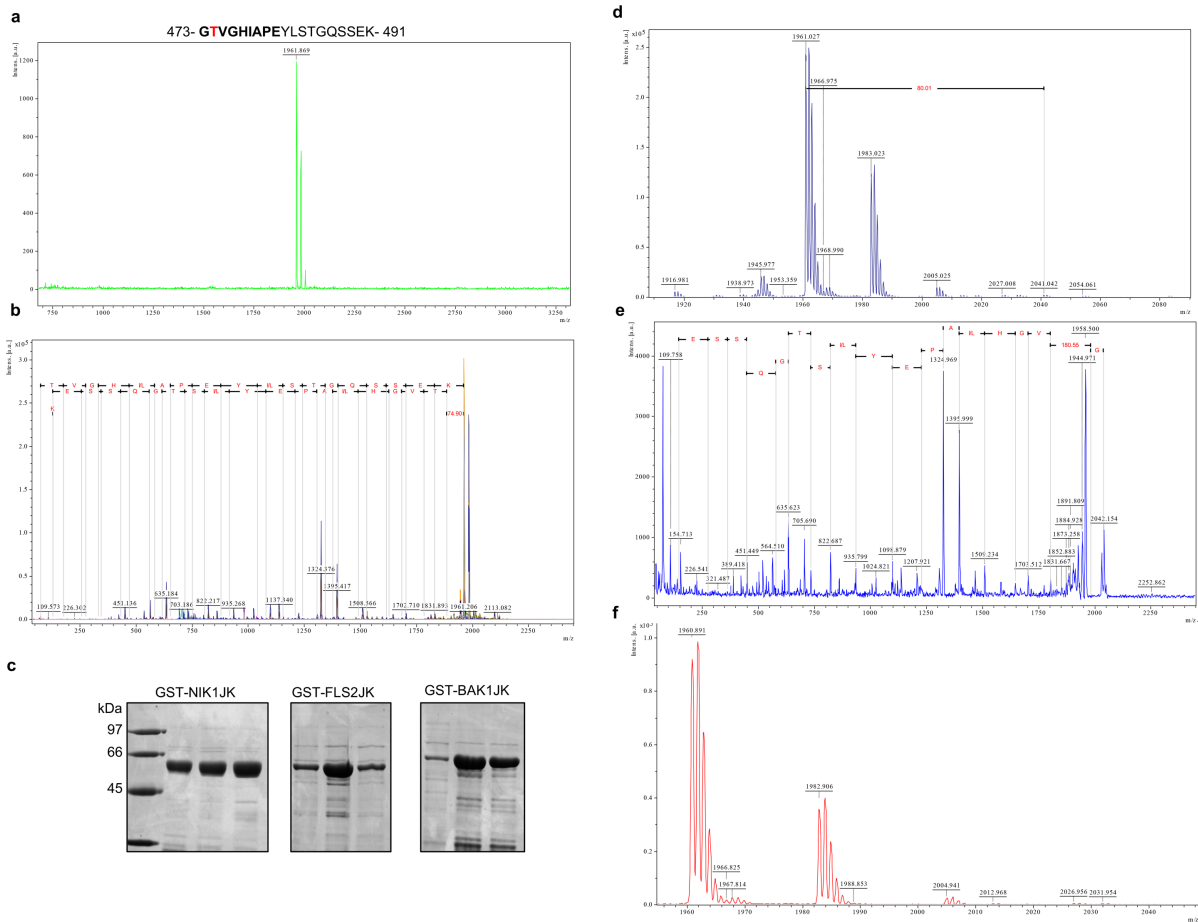

**Supplementary Fig. 7 The Thr474 residue is one important site of NIK1 phosphorylation activity.** **a** and **b** Mass spectrum analysis confirms the *in vitro* synthesized Thr474-containing NIK1 peptide sequence from the NIK1 activation loop. **c** *E. coli*-produced GST fusion proteins of NIK1JK (juxtamembrane domain and kinase domain), BAK1JK and FLS2JK were separated by SDS-PAGE and Coomassie blue-stained. **d** and **e** NIK1 autophosphorylation on Thr474 residue. MS spectrum of the *in vitro* synthesized peptide used as substrate in an *in vitro* kinase assay with GST-NIK1JK. The MS/MS spectrum of the phosphorylated peptide is shown in (**e**). **f** FLS2 does not phosphorylate NIK1 Thr474 in an *in vitro* kinase assay. The substrate peptide molecular weight monitored by MS spectrum from reaction with FLS2JK.



## Supplementary Figure 8

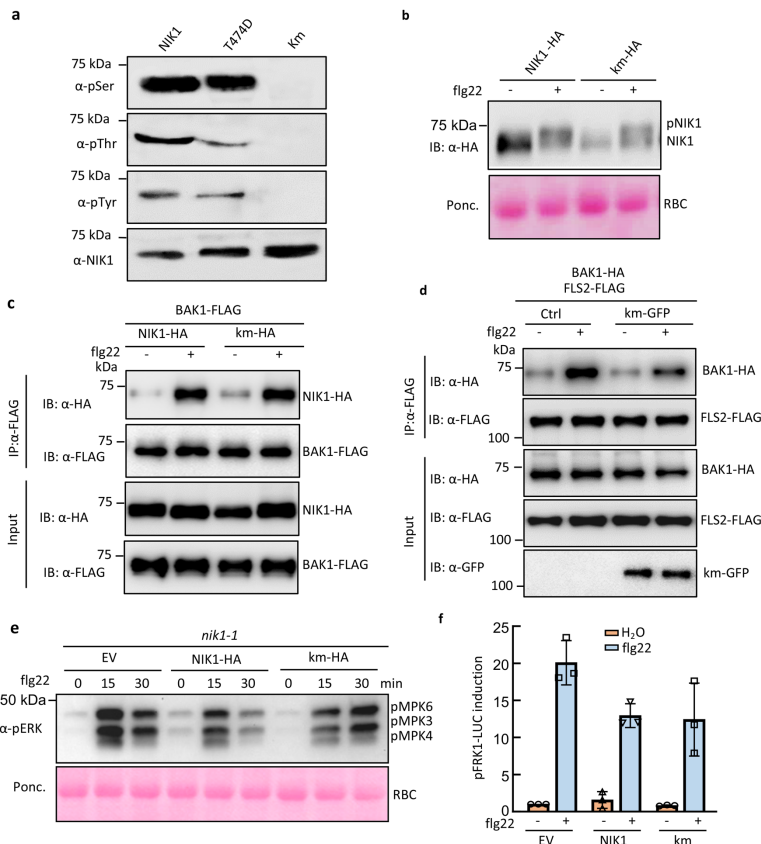

**Supplementary Fig. 8 NIK1 kinase activity is dispensable for the NIK1 negative regulatory role in the FLS2 signalling pathway.** **a** Kinase activity of different NIK1 variants. NIK1 phosphorylation levels were detected by immunoblotting with  $\alpha$ -phosphoserine ( $\alpha$ -pSer),  $\alpha$ -phosphothreonine ( $\alpha$ -pThr) antibodies or an  $\alpha$ -phosphotyrosine ( $\alpha$ -pTyr) antibody. NIK1 proteins were detected using an  $\alpha$ -NIK1 antibody as loading controls. **b** Flg22-induced mobility shift of NIK1 and NIK1 kinase mutant (km). Protoplasts were transfected with NIK1-HA or NIK1km-HA. Flg22 treatment was performed for 15 min before samples collection. Total proteins were showed by Ponceau S staining for RBC (bottom panel). **c** Flg22-induced association of BAK1 with NIK1 and NIK1km. BAK1-FLAG was co-expressed with NIK1-HA or NIK1km-HA in *Arabidopsis* protoplasts treated with 100 nM flg22. Co-IP assays were performed with  $\alpha$ -FLAG agarose beads and with  $\alpha$ -HA or  $\alpha$ -FLAG for IB (top two panels). The input control is shown on the bottom two panels. **d** Flg22-induced BAK1/FLS2 complex formation was inhibited by NIK1km. BAK1-HA and FLS2-FLAG were co-expressed with NIK1km-GFP in *Arabidopsis* protoplasts treated with 100 nM flg22 for 10 min. Co-IP was performed as in (c). **e** Flg22-induced MAPK activation in *nik1-1* protoplasts expressing empty vector (EV), NIK1-HA or NIK1km-HA. Protoplasts were treated with 100 nM flg22 for 15 and 30 min, and MAPK activity was detected by IB with an  $\alpha$ -pERK antibody (top panel). Total input proteins were showed by Ponceau S staining for RBC (bottom panel). **f** NIK1 and NIK1km suppress pFRK1::LUC induction. The pFRK1::LUC was co-transfected with vector control or NIK1 variants in protoplasts. UBQ10-GUS was included as a control and the luciferase activity was normalized with GUS activity. The data are shown as the mean $\pm$ SD from three independent biological replicates.

## Supplementary Figure 9

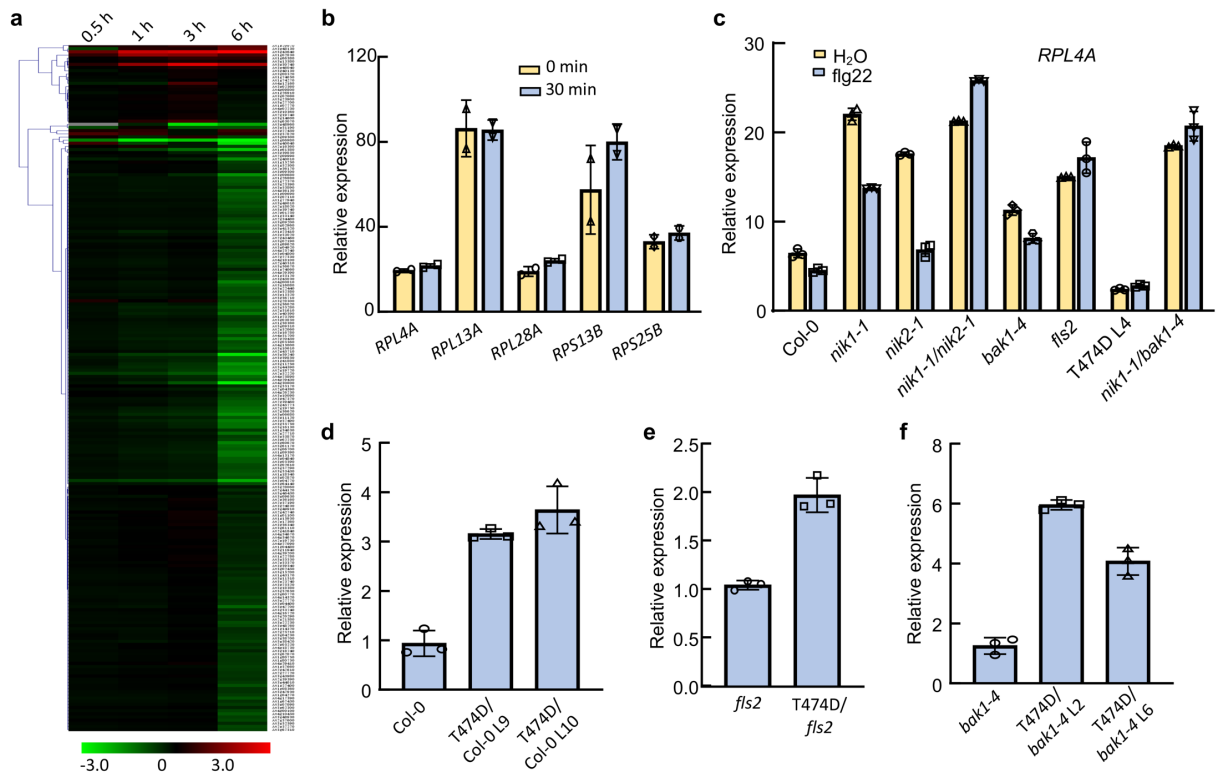

**Supplementary Fig. 9 Flg22-induced suppression of ribosomal gene expression in a NIK1 and FLS2/BAK1 dependent manner.** **a** Expression profiles of the *Arabidopsis* ribosomal protein gene family in response to flg22 treatment. Heatmap was generated based on the fold change after  $\log_2$  normalization with Mev software. **b** Transcript accumulation of selected RB genes 30 min after flg22 treatment. Gene expression of the indicated RB genes was determined by quantitative RT-PCR and *ACTIN2* as an internal control. **c** Flg22-induced suppression of *RPL4A* expression in different mutants. qRT-PCR analysis of *RPL4A* gene expression was performed with cDNA from indicated plants treated with or without flg22 treatment. *ACTIN2* served as an internal control. **d**, **e** and **f** NIK1 expression levels in Col-0, *fls2*, *bak1-4* and T474D-overexpressing lines as determined by qRT-PCR. The respective 95% confidence interval limits were estimated based on bootstrap resampling replicates of three independent (n=3) experiments and three technical repeats.

**Supplementary Table 1**

| <b>Supplementary Table 1- Primers used in methods</b> |                                         |                                                 |
|-------------------------------------------------------|-----------------------------------------|-------------------------------------------------|
| <b>Primers for qRT-PCR</b>                            |                                         |                                                 |
|                                                       | Fwd Primer                              | Rvs Primer                                      |
| NIK1 qPCR                                             | AGGCACGGTGGGTCACATT                     | TCCCGAAGCCAAAAACATCT                            |
| NIK2 qPCR                                             | CCAATGGCAGTGTGCTTCT                     | TGCTCCTAATGCTATTCGCTTTC                         |
| FRK1 qPCR                                             | GCCAACGGAGACATTAGAG                     | CCATAACGACCTGACTCAT                             |
| WRKY30 qPCR                                           | AGCCAAATTTCCAAGAGGAT                    | GCAGCTTGAGAGCAAGAATG                            |
| PP2C qPCR                                             | CGTGTTGGGGATTGATTTCG                    | AGAGCTCGGGCGGTTATG                              |
| PR1 qPCR                                              | GTTAGCGAGAAGGCTAACTAC                   | CATCCGAGTCTCACTGACTTTC                          |
| NHL10                                                 | TTCTGTCCGTAACCCAAAC                     | CCCTCGTAGTAGGCATGAGC                            |
| PHI1                                                  | TTGGTTTAGACGGGATGGTG                    | ACTCCAGTACAAGCCGATCC                            |
| UBQ10 qPCR                                            | AGATCCAGGACAAGGAAGGTATTC                | CGCAGGACCAAGTGAAGAGTAG                          |
| ACTIN2 qPCR                                           | ATGTCGTGAGCCATCCTGTC                    | ACACCGGATTTCGTGCGGCATAGAAG<br>A                 |
| At2G19730<br>RPL28A                                   | AAGCACTCTGGTCTTGCAAACA                  | GTGGTGCGGAGCACAAACAG                            |
| At2G21580<br>RPS25B                                   | CCGATCGTTACTCCGTCGAA                    | AGATTTGGCCGGCTTTGAT                             |
| At3G07110<br>RPL13A                                   | GGCTGATCCAGAGCTGAGTGAAA                 | GTGGTGACGAGCATCAACCA                            |
| At3G09630 RPL4A                                       | GTCACTGTTAGCTGAAGCACAGAG<br>A           | CCTCCTTGTAACGGTTTTCC                            |
| At4G00100<br>RPS13B                                   | TCAGGCTCATCTTGTTGAGA                    | CAGACGGGAGGGAGCTTCTT                            |
| qRT-TRV2                                              | TGCAGTGGCGGTGTTACAA                     | GTCGAGCCAGTGTTCGCCTT                            |
| <b>Primers for qPCR</b>                               |                                         |                                                 |
| CaLCuV DNA-B<br>qPCR                                  | GGGCCTGGGCCTGTTAGT                      | ACGGAAGATGGGAGAGGAAGA                           |
| 18S rDNA qPCR                                         | TAATTTGCGCG CCTGCTGCC                   | TGTGCTGGCGACGCATCATT                            |
| <b>Primers for RT-PCR</b>                             |                                         |                                                 |
| NIK1 RT                                               | AAAAAGCAGGCTTCACAATGGGA<br>GCTGCAAGAGGG | AGA AAG CTG GGT CTC ATC TAG<br>GACCAG AGA GCT C |
| NIK2 RT                                               | CCAATGGCAGTGTGCTTCT                     | TGCTCCTAATGCTATTCGCTTTC                         |
| BAK1 RT                                               | AAAAAGCAGGCTTCACAATGGACC<br>CAGAAGTTCA  | AGAAAGCTGGGTCTTCATTAAAGCA<br>TTCTTACAAC         |
| ACTIN2 RT                                             | GGCTGGATTTGCAGGAGATG                    | ACCATCACCAGAATCCAGCAC                           |
| <b>Primers for point mutations</b>                    |                                         |                                                 |
| NIK1Km                                                | GTGGTTGCAGTGGAAAGGCTTAAA<br>GAT         | ATCTTTAAGCCTTTCCTGCAACC<br>AC                   |
| <b>Primers for conventional PCR</b>                   |                                         |                                                 |
| CaLCuV DNA-B                                          | GCGTGGGGTATCTTACTC                      | GACAT AGCATCGGACATCC                            |
| <b>Primers for cloning</b>                            |                                         |                                                 |
| AtNIK1- NcoI                                          | CCATGCCATGGAGAGTACTATTGTT<br>ATGATG     |                                                 |
| AtNIK1- StuI                                          | GAAGGCCTTCTAGGACCAGAGAGC<br>TCCATTG     |                                                 |

| <b>Primers for genotyping</b> |                       |  |
|-------------------------------|-----------------------|--|
| LB b1.3                       | ATTTTGCCGATTTTCGGAAC  |  |
| NIK1 LP                       | GATACACAAGCCCTCTTGCAG |  |
| NIK1 RP                       | TGTTGTGTATCATCAGGAGGC |  |
| NIK2 LP                       | CCAAAGAAGAAAACCAAAGCC |  |
| NIK2 RP                       | AGAGAAGCTCCAAGCCAAAAC |  |
| BAK1 LP                       | CATGACATCATCATCATTCGC |  |
| BAK1 RP                       | ATTTTGCAGTTTTGCCAACAC |  |
| SID2 LP                       | AAGACACAATCCGATTTGCTG |  |
| SID2 RP                       | TCTGATGGATCTCCAATCGTC |  |
